# Supplementary material for: One-pot synthesis of sulfonated graphene oxide for efficient conversion of fructose into HMF
Source: Royal Society of Chemistry journal article supplement (doi:10.1039/c6ra23420h), 2016-01-01
Supplement: c6ra23420h1.pdf [file c6ra23420h1.pdf]

# **One-pot Synthesis of Sulfonated Graphene Oxide for Efficient Conversion of Fructose into HMF**

**Qidong Hou, Weizun Li, Meiting Ju, Le Liu, Yu Chen, Qian Yang**

*Tianjin Engineering Research Center of Biomass Solid Waste Resources Technology,*

*College of Environmental Science and Engineering, Nankai University, Tianjin*

*300071, PR China*

Corresponding author,

Email: [jumeit@nankai.edu.cn](mailto:jumeit@nankai.edu.cn); Tel: +86 13820988813;

Address: College of Environmental Science and Engineering, Nankai University, 94 Weijin Street, Tianjin, 300071, China.

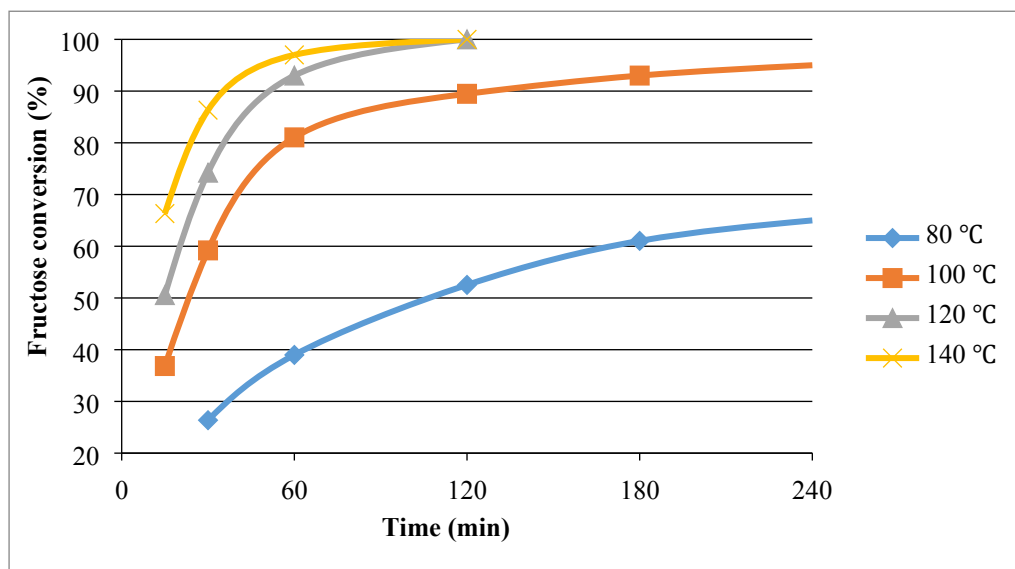

**Figure. S1** Effect of temperature and time on the fructose conversion. Reaction conditions: fructose (100 mg), DMSO (2 mL), SGO-3 (10 mg).
